# Supplementary material for: Total synthesis of strictamine: a tutorial for novel and efficient synthesis
Source: Royal Society of Chemistry journal article supplement (doi:10.1039/c7qo00837f), 2017-10-17
Supplement: c7qo00837f1.pdf [file c7qo00837f1.pdf]

## **Total Synthesis of Strictamine: A Tutorial for Novel and Efficient Synthesis**

Chao Wang,<sup>a</sup> Shiju Zhang,<sup>b</sup> Yan Wang,<sup>a</sup> Sha-Hua Huang,<sup>b,\*</sup> and Ran Hong<sup>a,\*</sup>

*a. CAS Key Laboratory of Synthetic chemistry of Natural Substances, Shanghai Institute of Organic Chemistry (CAS), 345 Lingling Road, Shanghai 200032; University of Chinese Academy of Science, 19A Yuquan Road, Beijing 100049, China.*

*b. College of Chemical and Environmental Engineering, Shanghai Institute of Technology, 100 Haiquan Road, Shanghai 201814, China.*

\*Corresponding author: rhong@sioc.ac.cn; shahua@sit.edu.cn.

### *Contents*

|                                                                           |    |
|---------------------------------------------------------------------------|----|
| 1. Garg's total synthesis of (+)-strictamine.....                         | S2 |
| 2. Zhu's total synthesis of (±)-strictamine.....                          | S3 |
| 3. Blakey's synthesis of the strictamine pentacyclic core structure ..... | S4 |
| 4. Fujii/Ohno's formal synthesis of (±)-strictamine.....                  | S5 |
| 5. Snyder's formal synthesis of (+)-strictamine.....                      | S5 |
| 6. Gaich's formal synthesis of (±)-strictamine.....                       | S6 |
| 7. Zu's total synthesis of (±)-strictamine.....                           | S7 |

1. Garg's total synthesis of (+)-strictamine. (*J. Am. Chem. Soc.*, 2016, **138**, 1162-1165)

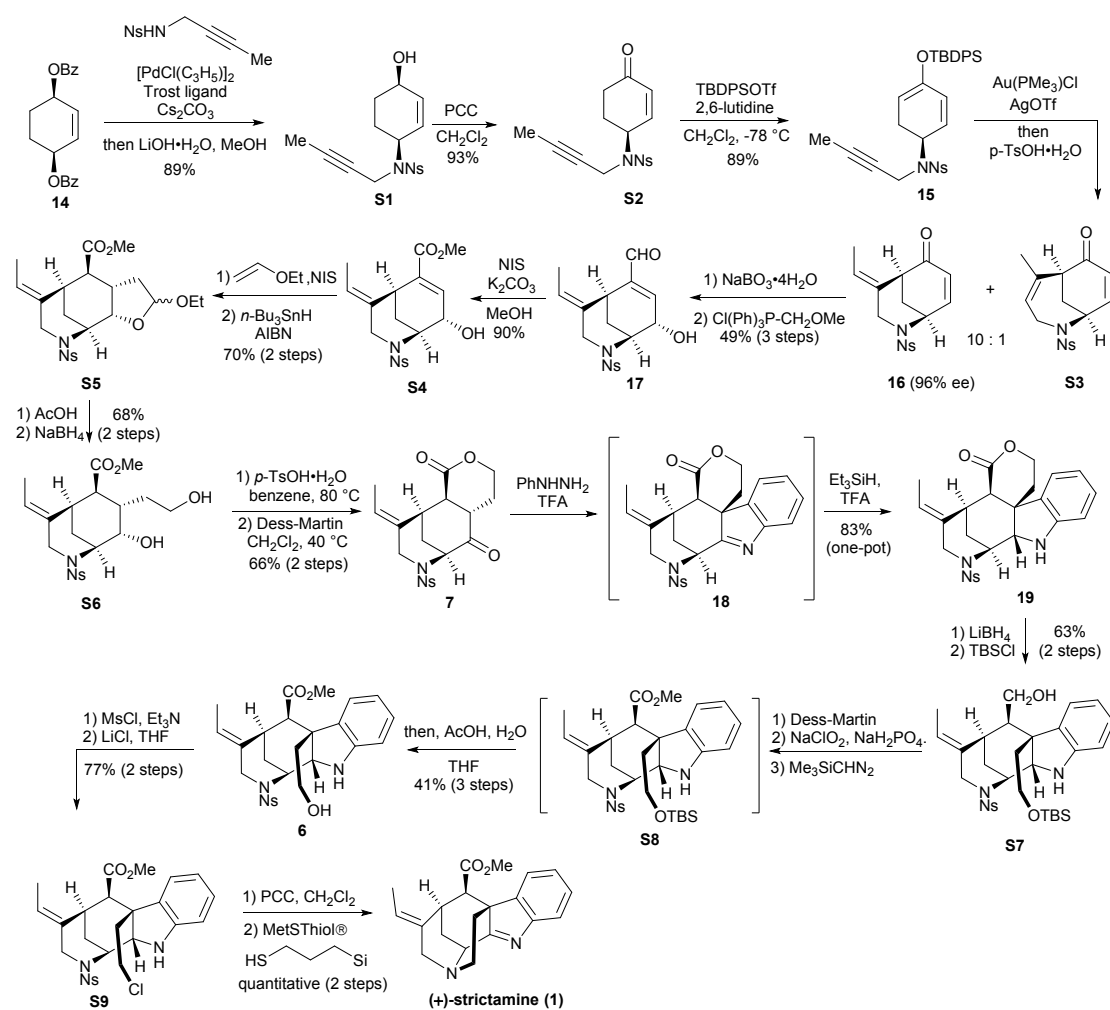

Scheme S1. Garg's total synthesis of (+)-strictamine

2. Zhu's total synthesis of (±)-strictamine. (*Angew. Chem. Int. Ed.*, 2016, **55**, 3500-3503)

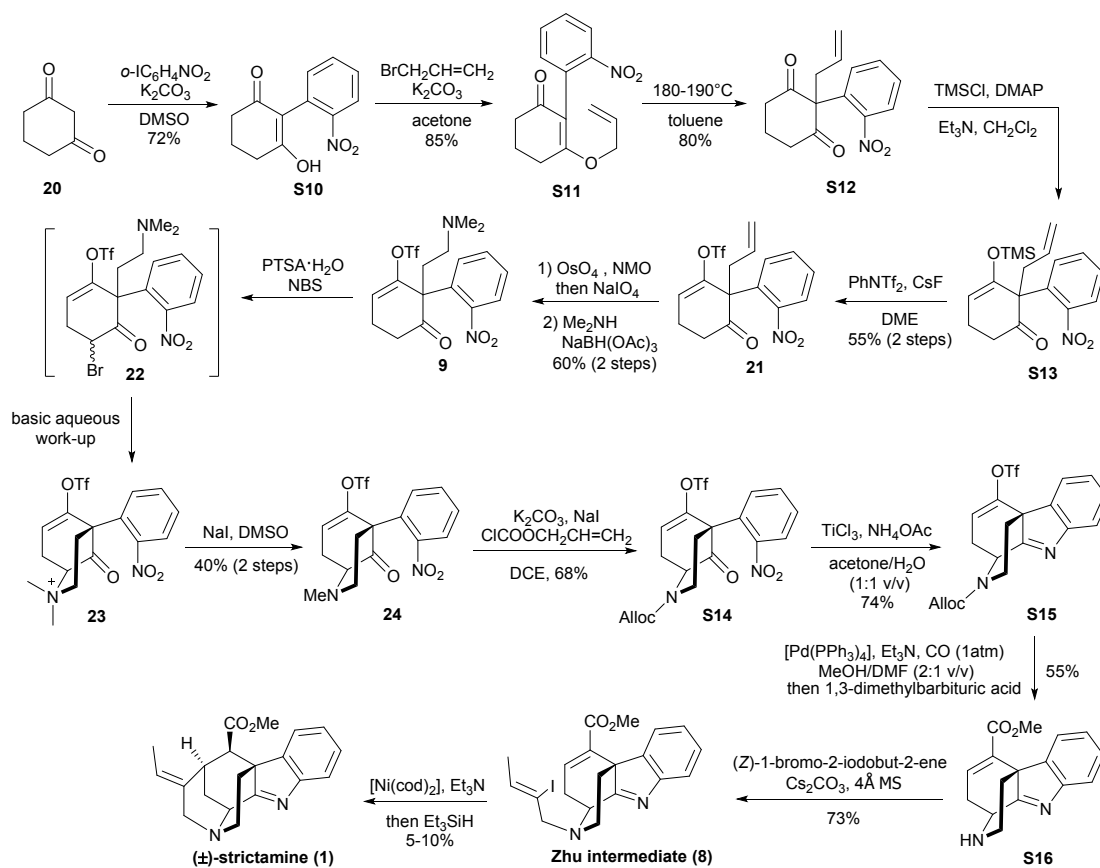

Scheme S2. Zhu's total synthesis of (±)-strictamine

3. Blakey's synthesis of the strictamine pentacyclic core structure (*Org. Lett.*, 2016, **18**, 6492-6495)

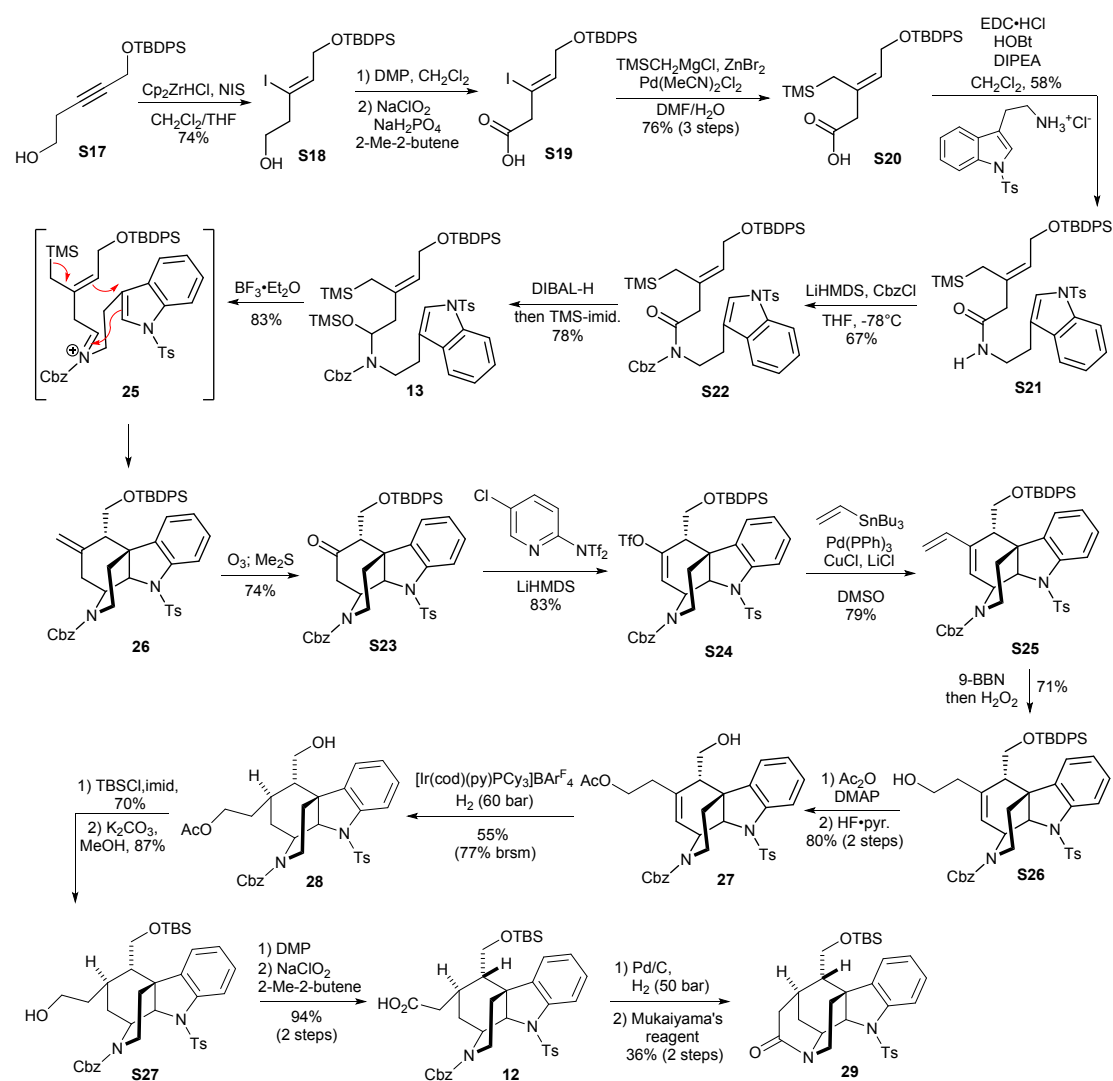

Scheme S3. Blakey's synthesis of the strictamine pentacyclic core structure

4. Ohno's formal synthesis of (±)-strictamine. (*Org. Lett.*, 2016, **18**, 1670-1673)

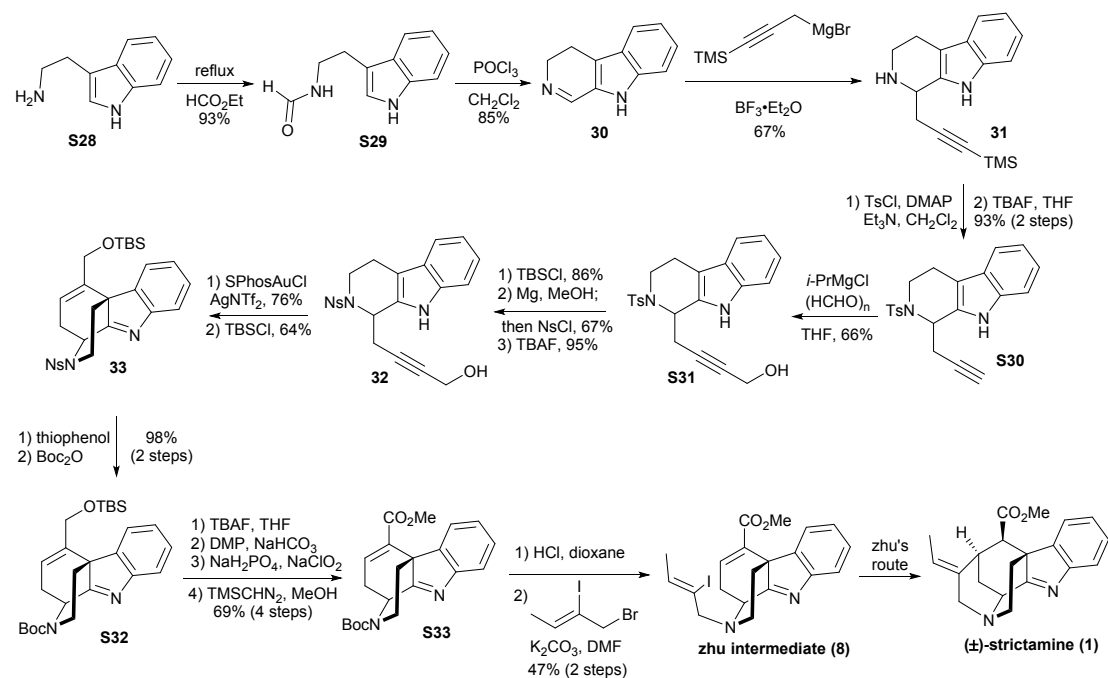

Scheme S4. Fujii/Ohno's formal synthesis of (±)-strictamine

5. Snyder's formal synthesis of (+)-strictamine. (*Org. Lett.*, 2017, **19**, 1004-1007)

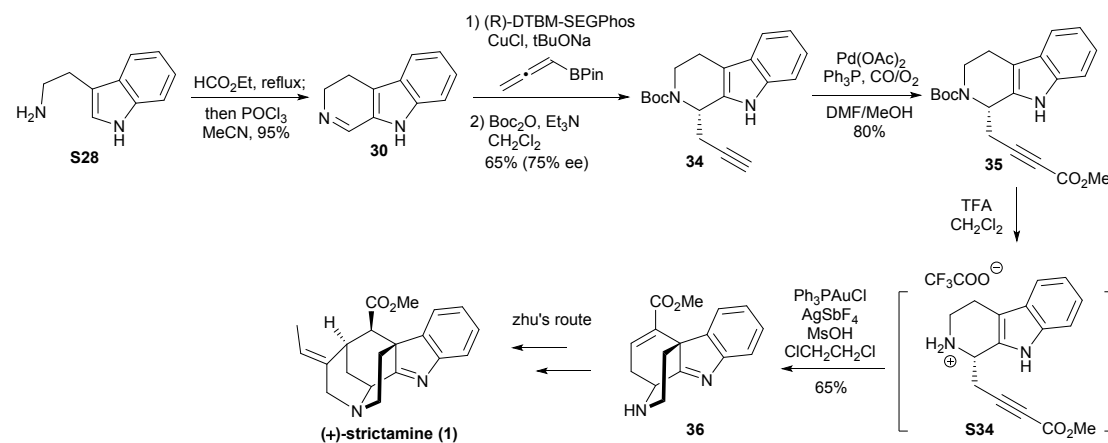

Scheme S5. Snyder's formal synthesis of (+)-strictamine

6. Gaich's formal synthesis of (±)-strictamine. (*Chem. Commun.* 2016, **52**, 11363-11365)

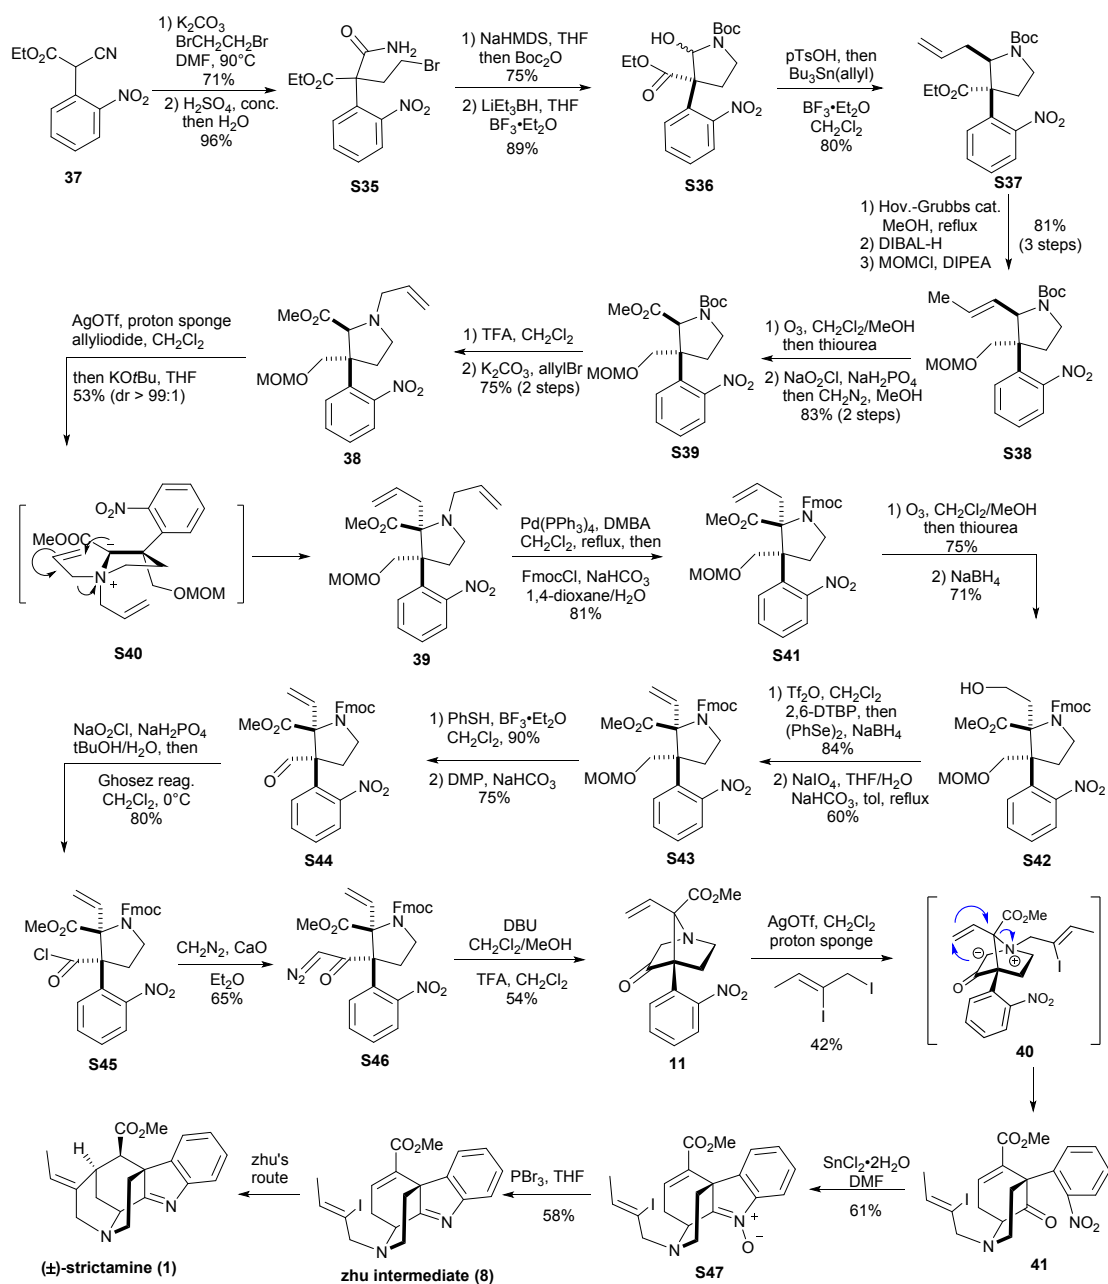

Scheme S6. Gaich's formal synthesis of (±)-strictamine

7. Zu's total synthesis of (±)-strictamine. (*Org. Lett.*, 2017, 19, 5430-5433)

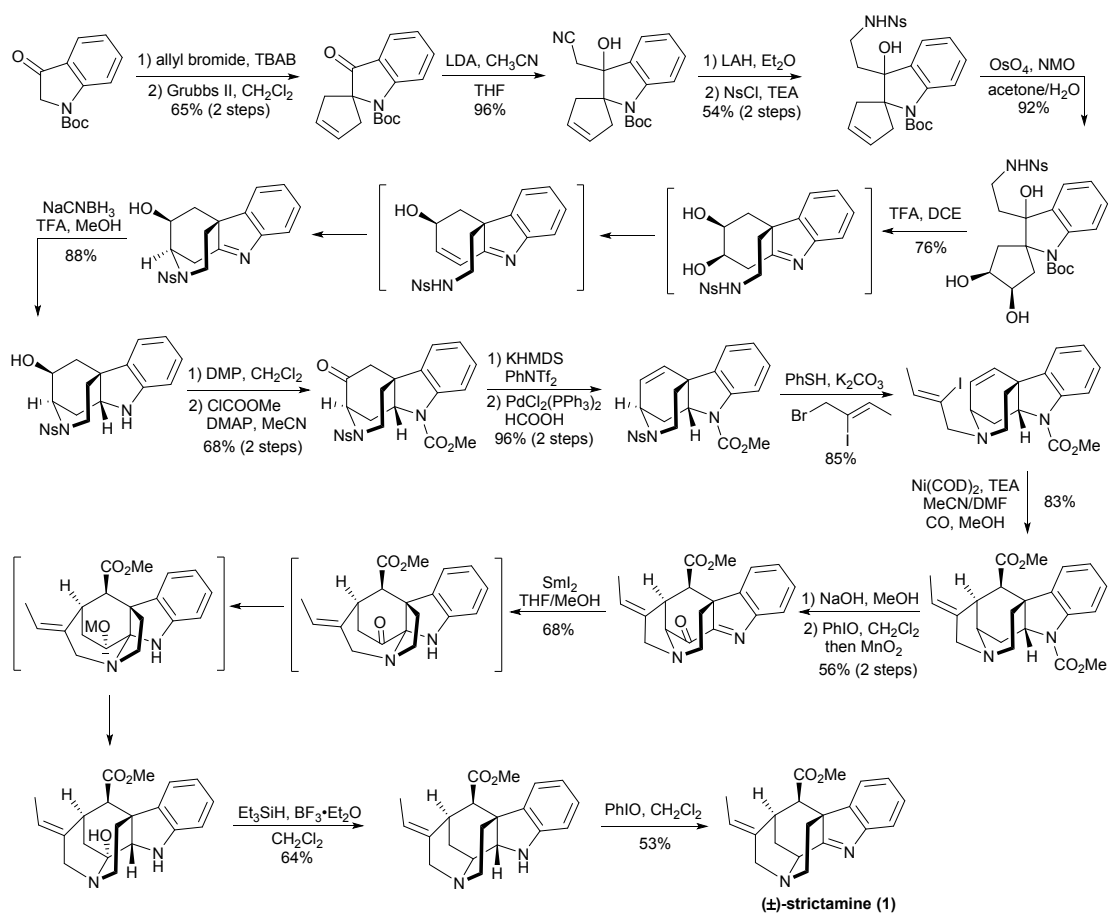

Scheme S7. Zu's total synthesis of (±)-strictamine.
